1     **Exploring barriers to seeking treatment for human African trypanosomiasis**  
2     **due to *T.b. rhodesiense* in communities around Vwaza Marsh Wildlife Reserve**  
3             **in Rumphi and Mzimba Districts, northern Malawi**

4  
5  
6     Alister C. Munthali<sup>1</sup>, Marshal Lemelani<sup>2</sup>, Fiskani Msutu<sup>1</sup>, Tisunge Zuwaki<sup>1</sup>, Frederick Juma<sup>3</sup> and Olaf  
7     Valverde Mordt<sup>4\*</sup>

8  
9  
10  
11     <sup>1</sup> Centre for Social Research, University of Malawi, P.O. Box 280, Zomba, Malawi.

12     <sup>2</sup> Ministry of Health, P.O. Box 30377, Lilongwe 3, Malawi.

13     <sup>3</sup> Rumphi District Hospital, Rumphi, Malawi.

14     <sup>4</sup> Drugs for Neglected Diseases *initiative*, Geneva, Switzerland.

15  
16  
17     \* Corresponding author

18     E-mail: [ovalverde@dndi.org](mailto:ovalverde@dndi.org) (OV)

19

20

## 21 **Abstract**

22

23 **Background:** *Rhodesiense* human African trypanosomiasis (r-HAT) remains a public health  
24 problem in Malawi, with the country reporting the highest number of cases of this acute form of sleeping  
25 sickness in the East African endemic region in 2019 and 2020. This paper explores the bottlenecks to  
26 seeking health care among patients with r-HAT around the Vwaza Marsh Wildlife Reserve (VMWR) in  
27 Rumphu and Mzimba districts in northern Malawi.

28 **Methodology/Principal Findings:** This qualitative study used key informant interviews  
29 (KIIs), in-depth interviews (IDIs) and focus group discussions (FGDs) to collect data. Study participants  
30 included health care workers, current and past r-HAT patients and their guardians, community leaders and  
31 traditional healers. All interviews were audio-recorded and transcribed verbatim. Content analysis was  
32 performed with NVIVO. Since r-HAT has similar signs and symptoms to malaria, patients either self-  
33 medicate or are prescribed antimalarial treatment, delaying the initiation of r-HAT treatment. While  
34 diagnosis of r-HAT can be done at health centre level, treatment requires hospitalization at the district  
35 hospital situated 60 kilometers away. Due to high levels of poverty, patients struggle to afford transport to  
36 the district hospital and their upkeep during hospitalization; patients and their guardians explained how they  
37 sold their property to fund this. In addition, patients fear undergoing very painful diagnostic lumbar  
38 puncture, which is very painful. Belief that r-HAT is caused by witchcraft still prevails, which also delays  
39 initiation of treatment. The delivery of r-HAT services is also affected by the transfer of trained health  
40 workers to other locations.

41 **Conclusions/Significance:** Access to r-HAT services, including treatment, could improve if  
42 community members were sensitized about the causes, signs and symptoms of the disease, and the fact that

43 it can be effectively treated at hospital but not by traditional healers. Provision of treatment for r-HAT by  
44 health facilities around the VMWR would eliminate transport costs for patients and their guardians.

45

## 46 **Author Summary**

47 Since 2019, Malawi has reported the highest numbers of cases of rhodesiense human African  
48 trypanosomiasis. This study found that patients and their families experience many challenges in seeking  
49 health care: the disease is misdiagnosed as malaria, leading to patients receiving the wrong treatment and  
50 late initiation of the right treatment; beliefs in witchcraft cause delays as patients seek treatment from  
51 traditional healers; high levels of poverty mean that patients struggle to fund transport to the district  
52 hospital, the only facility currently providing treatment, and their upkeep during periods of hospitalization;  
53 fear of undergoing the very painful diagnostic lumbar puncture; and the transfer of well-trained health  
54 workers away from the area. There is a need to create awareness about the causes, treatment, and prevention  
55 of sleeping sickness. Once patients are diagnosed with this disease, they should be advised to seek treatment  
56 from the hospital and not from traditional healers. Patients should also be able to access treatment at the  
57 nearby health facilities rather than the district hospital, which is situated a long way from the community.

58

## 59 **Introduction**

60 Human African trypanosomiasis (HAT), also known as sleeping sickness, is a vector-borne parasitic disease  
61 caused by a protozoan parasite of the genus *Trypanosoma brucei*. There are two species that cause two  
62 disease patterns in human beings: *Trypanosoma brucei gambiense* (g-HAT) and *Trypanosoma brucei*  
63 *rhodesiense* (r-HAT) [1]. G-HAT infection is chronic in nature, progresses slowly and causes less severe

64 symptoms, while r-HAT infection is usually acute, causing severe symptoms and usually leading to death  
65 within a few weeks if left untreated. R-HAT is found in Southern and Eastern Africa [2] including Malawi.  
66 In 2013 the World Health Assembly adopted the WHO roadmap on neglected tropical diseases (NTDs),  
67 which, among other targets, set the elimination of HAT as a public health problem as a goal for 2020,  
68 defined as fewer than 2,000 cases of both r-HAT and g-HAT reported per year. Mainly due to national and  
69 global commitments to eliminate the disease, this target was achieved: by 2020 there were just 663 cases  
70 of HAT reported globally.

71  
72 The only species found in Malawi is r-HAT, which occurs around three conservation areas, namely the  
73 Nkhota Kota Game Reserve and the Kasungu National Park (in central Malawi) and the Vwaza Marsh  
74 Wildlife Reserve (VMWR, in Rumphi and Mzimba North Districts in northern Malawi). Wild animals are  
75 the main reservoirs of r-HAT; parasites are transmitted to human beings by tsetse flies that have been  
76 infected by biting infected human beings or animals. Between 2011 and 2014, Uganda reported the highest  
77 number of cases of r-HAT of any country in Eastern and Southern Africa. However, since 2015 Malawi  
78 has been reporting the highest numbers of this disease, with the exception of 2017 when Uganda reported  
79 13 cases and Malawi seven [3].

80  
81 At a global level, there were 116 cases of r-HAT in 2019 and 98 in 2020 [3]. Table 1 shows the number of  
82 r-HAT cases reported in Malawi between 2011 and 2020.

83 **Table 1: Trend in number of r-HAT cases in Malawi [3]**

84

| <b>Year</b> | <b>No. of r-HAT cases</b> |
|-------------|---------------------------|
| <b>2011</b> | 23                        |
| <b>2012</b> | 18                        |
| <b>2013</b> | 35                        |

|             |    |
|-------------|----|
| <b>2014</b> | 32 |
| <b>2015</b> | 30 |
| <b>2016</b> | 35 |
| <b>2017</b> | 7  |
| <b>2018</b> | 15 |
| <b>2019</b> | 91 |
| <b>2020</b> | 89 |

85

86 Between 2011 and 2018, Malawi reported 35 cases or less per annum, but in 2019 the number of cases  
87 increased to 91, representing 78% of the total number of cases reported globally [3]. In 2019 and 2020,  
88 57/91 and 62/89 of the cases reported, in Malawi respectively, were from the VMWR area.

89

90 Case detection for r-HAT in Malawi is mainly passive and takes place when patients visit health facilities,  
91 with active screening done on a limited scale. Most cases of r-HAT are diagnosed at an advanced stage  
92 when symptoms are severe. Before 2013, Rumphi District Hospital was the only health facility that  
93 diagnosed r-HAT in the areas around the VMWR. Four health facilities in the area (Thunduwike, Malidade,  
94 Katowo and Mwazisi) have subsequently been upgraded and can now diagnose r-HAT. There has been a  
95 decrease in the percentage of cases resulting in death from 20.3%, between 2011 and 2013, to 8%, between  
96 2015 and 2017 [4]. Clinical diagnosis of r-HAT is difficult because the signs and symptoms are relatively  
97 non-specific. R-HAT needs to be diagnosed and treated rapidly as the disease evolves to invade the central  
98 nervous system, eventually leading to coma and death [1]. Since initial symptoms are similar to those of  
99 malaria, it is difficult to make a differential diagnosis in resource-poor countries with limited diagnostic  
100 facilities, such as Malawi [5]. Such delays in case detection increase the risk of patients needing treatment  
101 for late-stage r-HAT, which has a fatality rate 2.5 times higher than the early stage, once the parasites cross  
102 the blood brain barrier [6].

103

104 Identified cases of r-HAT are treated with the available drugs: suramin injections for the first stage, which  
105 are associated with occasional mild reactions, and intravenous injections of melarsoprol for the advanced  
106 stage, which cause frequent and severe adverse reactions [4]. Some cases of self-cure have been reported  
107 [4]. Drugs for the treatment of sleeping sickness in Malawi are donated by the WHO through an agreement  
108 with the producers, Sanofi and the Bayer Foundation. The Ministry of Health (MoH) organizes storage and  
109 distribution to health facilities. The Foundation for Innovative New Diagnostics (FIND) helped the MoH  
110 to set up laboratory equipment in four facilities in endemic areas around the VMWR. Over the years, the  
111 Pan African Tsetse and Trypanosomiasis Campaign has supported advocacy and social mobilization [7].  
112 The NTD programme has functional diagnosis and treatment centres in endemic districts and central  
113 reference hospitals.

114

115 R-HAT remains a public health problem in Malawi. As is the case with other endemic countries, it will be  
116 difficult for Malawi to eliminate r-HAT because of its zoonotic nature [8]. A population of infected tsetse  
117 flies is maintained among wildlife, which occasionally transmit the disease to human beings.

118

119 There is an urgent need to effectively reach at-risk populations living around the three game reserves,  
120 namely the VMWR, Kasungu National Park and Nkhota Kota Game Reserve, where this disease is  
121 endemic, and to create awareness about the aetiology, methods of prevention and diagnosis and treatment  
122 of r-HAT. Understanding people's perceptions, beliefs and practices will help to inform policy and  
123 programming for this disease. This paper explores people's beliefs about the causes of r-HAT and patients'  
124 pathways for seeking health care around the VMWR in Rumphi and Mzimba North Districts, where most  
125 r-HAT cases in Malawi are detected.

126

## 127 **Methods**

128 This study used an ethnographic approach to capture the lived experiences of community members seeking  
129 treatment for r-HAT. Several methods of data collection were used, including participant observation, key  
130 informant interviews (KIIs), in-depth interviews (IDIs) and focus group discussions (FGDs), as described  
131 below.

132

### 133 **Key informant interviews**

134 The National Trypanosomiasis Control Programme helped to identify key informants (KIs) involved in  
135 the management of r-HAT at both district and community levels. These KIs included the programme  
136 coordinator, health surveillance assistants (HSAs), medical assistants and community leaders, including  
137 religious and traditional leaders. Sixteen purposively selected KIs were interviewed in areas around the  
138 VMWR. The KIIs focused on the aetiology and prevention of r-HAT, how the disease is experienced and  
139 factors that inhibit or facilitate seeking of healthcare services by patients with r-HAT.

140

### 141 **In-depth interviews**

142 Eighteen IDIs were conducted with purposively selected community members, including former r-HAT  
143 patients, mainly to understand their perceptions, lived experiences, and strategies for coping with the  
144 disease. Interviews were also conducted with caregivers and family members who shared the challenge of  
145 seeking care within Malawi's health care system. The IDIs helped us to better understand people's health-  
146 seeking behaviour and drug intake during episodes of r-HAT. The informants were recruited from  
147 communities around the VMWR with the help of HSAs.

148

### 149 **Focus group discussions**

150 Six FGDs were conducted with community members and between 8 and 10 participants attended each FGD:  
151 one with men, two with women, one with caregivers/guardians of current or former r-HAT patients, one  
152 with recovered r-HAT patients and one with recently treated people. The focus of these FGDs was to gather  
153 their perceptions of r-HAT, how it is experienced and the factors that inhibit or facilitate the seeking of  
154 healthcare services by patients with r-HAT.

155

## 156 **Recruitment and training of research assistants**

157 Five research assistants (RAs), fluent in Tumbuka/Chichewa, with a bachelor's degree and not less than 2  
158 years' experience of collecting qualitative data were recruited and trained over 4 days. The RAs helped to  
159 conduct FGDs, IDIs and some KIIs, as well as transcription. All participants in this study were  $\geq 18$  years  
160 old.

161

## 162 **Data management and analysis**

163 All the transcripts were read and re-read to determine emerging themes. The major themes identified from  
164 the wider study were (i) the aetiology of r-HAT and how it is transmitted; (ii) the local terminologies for r-  
165 HAT, including signs and symptoms of the disease; (iii) health seeking behavior, including barriers to  
166 seeking treatment; (iv) prevention of r-HAT; (v) effects of r-HAT (on individuals, families and wider  
167 community); (vi) coping strategies for individuals, families and communities, and; (vii) motivation to  
168 seeking treatment. A coding framework consisting of themes and sub-themes was developed using NVivo  
169 12 software. All transcripts were imported into NVivo 12 and relevant texts from the transcripts were coded  
170 under each sub-theme. The NVivo software was used to organize the qualitative data using a thematic  
171 content analysis approach. In this paper only thematic areas (i)-(iii) are considered.



172

## 173 **Ethical considerations**

174 This study was approved by the University of Malawi Research Ethics Committee (UNIMAREC). All study  
175 participants were assured that the information they shared would remain confidential, their identity would  
176 not be disclosed, and they were free to not answer any question. Participation was voluntary. Recorders  
177 were used during the interviews and FGDs, and permission was sought from informants before tape/digital  
178 recording. Informed consent was obtained from study participants prior to the start of the interviews.

179

## 180 **Results**

### 181 **Signs and symptoms of sleeping sickness**

182 In areas around the VMWR in both Rumphi and Mzimba Districts, *kaskembe* is the local term used to refer  
183 to both the tsetse fly and the disease. Most informants, including current and previous patients and their  
184 guardians, community leaders and health workers reported that patients with sleeping sickness present with  
185 signs and symptoms similar to malaria, namely fever, headache, anaemia and general body pains, especially  
186 in the early stages of the disease. In addition, most study informants added that people with *kaskembe* doze  
187 or sleep during the day while chatting.

188

189 “... According to my experience, she felt discomfort. She had fever. Then she easily went to  
190 sleep. You are speaking to her and then you realize that you are alone. She is asleep. I used to  
191 shake her to say; ‘are you with me?’ you see. ‘I am speaking to you’ then 2 minutes she is  
192 gone. She is asleep again’ yeah it was like that. Then fever came in, little by little. And then I  
193 noted that she started speaking alone .....” (Caregiver of a patient with sleeping sickness,  
194 Thunduwike, Mzimba).

195

196 Most people, including a teacher at Thunduwike in Mzimba, reported that malaria can be differentiated  
197 from sleeping sickness because a person who has sleeping sickness tends to sleep more often. Another  
198 symptom mentioned by most informants in this study was that patients with this disease experience  
199 malfunctioning of some body parts and consequently become disabled. They feel a lot of pain, especially  
200 in the joints, and cannot walk when the disease is in an advanced stage.

201  
202 “...I could not walk instead I was crawling like a baby because I could feel pain in all joints  
203 and there was no energy for me to walk to the extent that I could feel as if I have worked over  
204 my capacity, especially this was happening with knee joints....”, (recovered patient, Mwazisi,  
205 Rumphu).

206  
207 Other signs and symptoms mentioned by some participants included loss of appetite, oedema, dermatitis,  
208 fatigue and loss of body weight.

209

## 210 **Causes of sleeping sickness**

211 All informants in this study, including health workers and community members, were aware that people  
212 get sleeping sickness after being bitten by infected tsetse flies.

213

214 “Sleeping sickness comes from animals. When tsetse flies bite these animals and suck their  
215 blood they carry it. Whenever they bite human beings they transfer that parasite into human  
216 bodies and that is how sleeping sickness is caused. *Kaskembe* [the fly] is like a general player  
217 as it feeds on both human and animal blood”, (Traditional leader, Thunduwike, Mzimba).

218

219 Study participants acknowledged that sleeping sickness is very common in their community because people  
220 live very close to the VMWR and many enter the wildlife reserve without permission to poach, fetch

221 firewood, collect mushrooms during the rainy season, produce charcoal, wash clothes and fetch drinking  
222 water and, whilst they are there, get bitten by tsetse flies.

223  
224 There were, however, a few informants who believed that r-HAT is caused by witchcraft. Some informants,  
225 especially at community level, reported that some people share this belief, saying, '*kuli nyanga za*  
226 *kaskembe*', which means there is sleeping sickness caused by witchcraft. Some people believe that this  
227 disease is caused by witchcraft and can only be dealt with by traditional healers and so do not seek formal  
228 health care services and eventually die. One clinician had patients who, despite being diagnosed with  
229 malaria and treated, did not get better. They concluded that they had been bewitched and sought traditional  
230 medicine rather than going to a health facility.

231  
232 "I have some cases which have spent quite a long period of time going from one traditional  
233 healer to the other to seek medical attention. At the time they are coming to the hospital, the  
234 disease is far much advanced .... So, this thing also happens", (Key informant, Rumphu)

235  
236 Some people around the VMWR associate sleeping sickness with witchcraft because people with this  
237 disease sleep during the daytime: they think they do this because at night they are out bewitching people.  
238 Others say they have been bewitched and so they sleep during the day instead of doing productive work.  
239 While such beliefs persist in areas around the VMWR, some informants, including an HSA at Manolo in  
240 Mzimba, reported that these days most people know that sleeping sickness is caused by tsetse flies.

241  
242 Some study informants reported that it was also possible to get this disease by consuming contaminated  
243 bush meat.

244  
245 "Sometimes you may develop sleeping sickness if you eat contaminated bush meat. .... This  
246 is why some people who have never stepped their feet in the game reserve still get infected.

247 Some people don't cook meat thoroughly so the parasites that cause sleeping sickness may  
248 still be active and infect the consumers", (P2, FGD with men, Manolo, Mzimba).

249  
250 This is why one community leader discourages community members from purchasing meat from the game  
251 reserve/poachers because it is allegedly infected with the microorganisms that cause sleeping sickness. In  
252 addition, a key informant added that they have observed that new-born babies can test positive for sleeping  
253 sickness, indicating mother-to-child transmission of the disease.

254

## 255 **Treatment of sleeping sickness**

256 People suffering from sleeping sickness can either self-medicate, seek treatment from traditional healers or  
257 churches or go to the health facility for diagnosis and subsequent treatment.

258

## 259 **Self-medication with medicines**

260 Study participants said that the signs and symptoms of r-HAT are similar to those of malaria. People at  
261 community level are aware of malaria treatment and so when someone with sleeping sickness presents with  
262 signs and symptoms of malaria, in some cases they will purchase drugs and self-medicate. Many previous  
263 patients narrated that this was their experience, they purchased malaria medicines when they observed that  
264 they had signs and symptoms of this disease, but they did not get cured and were later diagnosed as having  
265 r-HAT. Patients that self-medicate in the early days of r-HAT may realize that they need to be tested and  
266 treated in time or they may die because they leave it too late to seek the appropriate treatment.

267

## 268 **Traditional healers**

269 People with r-HAT may not initially know that they are suffering from this disease and either self-medicate  
270 or seek treatment from traditional healers, as they may think they have been bewitched.

271

272 “When I started showing the signs and symptoms, I could not figure out that it was sleeping  
273 sickness. As a result, I went to different traditional healers who also told me that I was  
274 bewitched and they gave me traditional medicine which I was taking but there was no change”,  
275 (Recovered patient, Thunduwike, Mzimba).

276

277 Many previous and current patients and their guardians sought treatment from traditional healers, for  
278 example, one former patient explained that he thought he had been bewitched because he had quarreled  
279 with someone over land. In all cases of sleeping sickness, the traditional medicines that patients took did  
280 not cure them and their condition deteriorated. This was the point at which a decision was made to go to  
281 the health centre for further diagnosis and treatment. Most participants were of the view that seeking  
282 traditional medicines for the treatment of sleeping sickness is a waste of time and financial resources.

283

### 284 **Seeking treatment from health facilities**

285 Initially the diagnosis of sleeping sickness in communities around the VMWR was only performed at  
286 Rumphi District Hospital, situated about 70 kilometres from the reserve. A KI at Rumphi District Hospital  
287 reported that, in addition to Rumphi District Hospital, there are 5 other health centres around the VMWR,  
288 namely Bolero, Mwazisi, Katowo, Malidade and Thunduwike, that provide diagnostic services for sleeping  
289 sickness. Many informants in this study reported that when someone is diagnosed with sleeping sickness,  
290 they are referred to Rumphi District Hospital for further confirmatory testing and subsequent treatment.  
291 The facilities around the VMWR do not provide treatment for sleeping sickness. A clinician explained that  
292 once sleeping sickness has been confirmed, the patient is given suramin if the trypanosomes are found in  
293 the blood. However, if the trypanosomes have affected the central nervous system, the patient is given  
294 melarsoprol. In addition to these two treatments, a new drug called fexinidazole (taken orally) has recently  
295 been introduced and is being piloted in a clinical trial in Rumphi.

296

297 “... They are doing trials or investigations of that drug at Rumpho District Hospital. Currently,  
298 there are some sleeping sickness patients who have taken this treatment and other have  
299 finished taken their dosage”, (Microscopist, Manolo, Mzimba).

300

301 Many patients talked about their experience with lumbar puncture, which clinicians explained is used to  
302 determine whether the trypanosomes have entered the central nervous system; this can only be done at  
303 Rumpho District Hospital.

304

## 305 **Barriers to seeking treatment for r-HAT**

306 There are several challenges experienced by community members to seeking treatment for r-HAT.

307

### 308 **Late diagnosis of sleeping sickness**

309 Many participants reported that signs and symptoms of r-HAT are the same as for malaria. When patients  
310 with r-HAT visit a health facility, they are given malaria treatment based on their symptomatology. When  
311 the situation does not improve, some decide to return to the same health centre while others go to Rumpho  
312 District Hospital where they are tested for r-HAT. Participants mentioned that some clinicians recommend  
313 that patients coming from communities around the VMWR should take a test for sleeping sickness the first  
314 time they go to health facilities, while others do not. There are, therefore, delays in diagnosing r-HAT which  
315 subsequently delay initiation of the correct treatment of the disease.

316

### 317 **Transportation**

318 Until recently, diagnosis and treatment of r-HAT was only available at Rumpho District Hospital, however,  
319 diagnostic services have now been established in health centres around the VMWR. Once diagnosed with  
320 r-HAT, patients are referred to Rumpho District Hospital for further tests, including lumbar puncture, and

321 subsequent initiation of treatment. However, due to high levels of poverty, some patients do not  
322 immediately seek treatment, as Rumphi District Hospital is situated 60-75 kilometers away from these  
323 communities.

324

325 “.... Due to problems of transport, some patients after being diagnosed with sleeping sickness,  
326 go back to their respective homes instead of going to Rumphi District Hospital for treatment  
327 because they are poor and cannot afford to pay for their transport to the district hospital for  
328 treatment. Although they have the referral letter, they still go back home and wait until they  
329 find transport to go to Rumphi District Hospital for treatment”, (Teacher, Thunduwike,  
330 Mzimba).

331

332 Study participants reported that sleeping sickness affects poor communities. Transportation is a major  
333 challenge for people in the communities around the game reserve, which explains why most patients only  
334 travel to Rumphi District Hospital when the disease is at a very advanced stage. Many study participants  
335 reported that a patient suffering from sleeping sickness cannot travel to Rumphi District Hospital alone, he  
336 must be accompanied by at least one guardian(s). Transport must also be provided for at least one guardian,  
337 making it very expensive.

338

339 “It was very difficult for me to know that I was suffering from sleeping sickness. In addition,  
340 it was difficult for me to travel to Rumphi District Hospital due to long distance, and I had no  
341 money to use for transportation with my guardian. Due to this, my situation worsened and the  
342 brain was mostly affected which may also lead to madness ....”, (Recovered patient,  
343 Thunduwike, Mzimba).

344  
345  
346  
347  
348  
349  
350  
351  
352  
353  
354  
355  
356  
357  
358  
359  
360  
361  
362  
363  
364  
365  
366

Informants in this study estimated that the cost of one-way transport to Rumphi is around 4.4 USD per person. Lack of money for transport to Rumphi District Hospital is one of the major factors contributing to delays in seeking care for sleeping sickness.

### **The process of diagnosing sleeping sickness is painful**

A health worker at one of the health centres around the wildlife reserve reported that people with r-HAT are afraid of lumbar puncture when they are referred to Rumphi District Hospital: this involves the insertion of a needle into the spinal canal to collect cerebrospinal fluid for diagnostic testing of r-HAT and to stage the disease. This was reported by many participants in this study.

“The process of confirming the diagnosis of sleeping sickness at district level is a painful process: specimen has to be taken from the spine and once one goes to Rumphi District Hospital he or she has to undergo this process ..... My patient said that it’s a painful process because they have to bend much for the doctors to get the specimen [from spine]. It takes time also for the doctors to collect the specimen. So, the patient bends for some time and when they are done collecting the specimen, it is not easy for the patient to come back to normal state ....”, (P4, FGD with guardians of patients with sleeping sickness, Malidade, Mzimba).

A game ranger reported that community members claim health workers instruct patients to bend their back until their head reaches their legs in order to take a specimen from the spinal cord, and that health workers tie patients with rubber to avoid problems with taking the specimen.



367 “We are tied and squeezed with the back bent so that the head touches the knees. Other people  
368 help in pinning the patient so that there is no movement as the injection is inserted on the back.  
369 They act as if they are killing a cow”, (P1, FGD with men, Manolo, Mzimba).

370  
371 When community members hear such stories, they become frightened about accessing treatment for r-HAT  
372 at the health facility, which contributes to delays in seeking treatment. Some community level participants  
373 also said that some health workers are not experienced at taking specimens from the spinal cord, have to  
374 make several attempts and thus make the patient feel more pain.

375

### 376 **Lack of food items**

377 During hospitalization people with sleeping sickness are provided with food by the hospital. However,  
378 guardians must provide food for themselves. Many informants reported that patients and guardians lack the  
379 necessary food and money to sustain themselves during the period of hospitalization. Guardians of patients  
380 with sleeping sickness sometimes have to work in order to provide for the patient as well as for themselves.

381

382 “While being a guardian, I had to leave her alone and go outside and source some piece works.  
383 The kind of piece work was to do with farming. You know it was farming season. So that’s  
384 the only piece work I would have done. I leave her and do the piece work and the money I use  
385 to buy what she needs or she wants. I managed this life until she was discharged. I came back  
386 home without even a debt”, (Guardian of patient with sleeping sickness, Thunduwike,  
387 Mzimba).

388

389 The challenge to provide food and other items for the patient and guardian(s) is exacerbated by the long  
390 hospitalization period of, usually, up to 4 weeks.

391

## 392 **Belief in traditional healers**

393 There are some people living in communities around the VMWR who still believe in witchcraft and  
394 that traditional healers can cure r-HAT. A microscopist at one health centre near the VMWR reported  
395 that people with such beliefs first visit a traditional healer before considering going to the hospital  
396 for treatment.

397

398 “When I started suffering from this disease my wife and I visited the traditional healers to seek  
399 help because I was thinking that I have been bewitched due to what was happening. I told you  
400 that I was unable to walk, this on its own made me think it wasn’t normal at all, hence, the  
401 visit to traditional healer. And the traditional healer told me that I was really bewitched and  
402 gave me some traditional medicine”, (Patient with sleeping sickness, Thunduwike, Mzimba).

403

404 This informant said that he visited more than two traditional healers but that after receiving traditional  
405 medicines the situation did not change, which made him think of going to hospital. In some cases when a  
406 person has signs and symptoms of sleeping sickness, they and their relatives may think that they need to  
407 perform the vimbuza, a traditional healing dance popular among the Tumbuka people living in northern  
408 Malawi.

409

410 “... I can be sick and showing many signs but some people can say its vimbuza and the person  
411 has to go to the traditional healer and dance for the evil spirits to come out of the patient. We  
412 lose a lot of lives seeking traditional medicine while that person is suffering from sleeping  
413 sickness”, (P3, FGD with women, Katowo, Rumphu).

414

415 The existence of such beliefs constitutes a major barrier to seeking treatment for sleeping sickness. Some  
416 people who had sleeping sickness and were cured acknowledged that, had they sought treatment from

417 traditional healers, they would not have survived. Participants in this study cited many cases of people who  
418 sought treatment from traditional healers and, therefore, went to health facilities very late when the disease  
419 was well advanced and died. The belief that witchcraft is a cause of r-HAT is declining as experience  
420 increasingly demonstrates the failure of traditional medicine and the effectiveness of hospital treatment.  
421 Previously, traditional healers used to accept patients suffering from sleeping sickness, but this is changing.

422  
423 “... As of now the traditional healers no longer admit people with r-HAT. They just sensitize  
424 people about the disease. They refer the person to go to the hospital for treatment and testing”,  
425 (HSA, Mwazisi, Rumphi).

426  
427 “You cannot go to the traditional healers to seek remedy. A lot of people they have lost their  
428 loved ones due to this philosophy. A lot of people I tell you have lost their loved ones. The  
429 time they said; ‘let’s go to hospital’ upon arrival, the patient also dies. You see”, (P3, FGD  
430 with caregivers, Malidade, Mzimba).

431  
432 One patient with sleeping sickness at Mwazisi, Rumphi said that in some cases people also resort to  
433 Pentecostal churches.

434

### 435 **Misperceptions about testing for sleeping sickness**

436 Workers from health centres around the VMWR or from Rumphi District Hospital visit the reserve to test  
437 staff members and people around the reserve for r-HAT. While many informants reported that large  
438 numbers of people are tested, there are some misperceptions about testing for sleeping sickness: in some  
439 FGDs, for example with women at Katowo in Rumphi, participants reported that some community members  
440 do not want to go to hospital for r-HAT screening because they relate this to testing for HIV, thinking that  
441 health workers use the same test to diagnose HIV, and that they would rather not know their status.

442

443 “Such people are afraid of going to the hospital to get tested even when the doctors come to  
444 our camp here, such people cannot come for the test because of the perceptions they have  
445 towards testing tools. Due to this negligence, patients may seek help or start treatment when  
446 the situation has worsened which has led to loss of many lives. However, when the doctors  
447 from Rumphi District Hospital come here they explain everything that they come to test  
448 sleeping sickness only and no other diseases and that there is no connection between sleeping  
449 sickness and HIV/AIDS”, (P4, FGD with women, Katowo, Rumphi).

450

451 Although some people have the signs of sleeping sickness, it is very difficult for them to go to hospital to  
452 be tested, despite living close to the game park.

453

#### 454 **Poor attitude of health workers**

455 While informants in this study appreciated the assistance they get from their health workers in nearby health  
456 facilities, some of them have a poor attitude (they are rude and they do not treat patients well) which  
457 discourages patients from visiting the health facilities.

458

#### 459 **Shortage of staff**

460 Health centres have been equipped to conduct tests for sleeping sickness. However, both health workers  
461 and community members reported shortages of staff, with only one microscopist at a health centre and tests  
462 only being conducted on designated days of the week. In some cases, health workers trained to conduct  
463 tests for sleeping sickness are not available when patients visit the health facility, so people return to their  
464 homes without being helped. A KI at Rumphi District Hospital reported that the programme has trained  
465 some health workers on how to manage sleeping sickness, including diagnosis and treatment. However,

466 some of these trained health workers choose to move away or are transferred elsewhere and are replaced  
467 by staff who are neither trained nor qualified.

468

## 469 **Abandonment of hospitalization**

470 While most patients adhere to the current hospitalization requirement for treatment, there have been cases  
471 where patients have escaped from hospital, mainly because of the pain but also because of other challenges  
472 experienced during hospitalization.

473

## 474 **Discussion**

475 This discussion has been organized around the following themes: knowledge about r-HAT, beliefs about r-  
476 HAT, misdiagnosis and the poor attitude and perceived practices of health workers.

477

## 478 **Knowledge about r-HAT**

479 This paper has outlined people's perceptions about the aetiology and treatment of r-HAT in communities  
480 around the VMWR. As has been noted in other studies [9], community members are generally aware of the  
481 signs and symptoms of r-HAT and that these are similar to those of malaria in the early stages of this  
482 disease, which complicates finding the right therapy. Frequent sleeping is a major symptom of r-HAT, and  
483 patients have an uncontrollable desire to sleep at any time [2], even during the day, as mentioned in this  
484 study. Community members are aware of the signs and symptoms of this disease. This study has found that  
485 health workers know that the disease is caused by microorganisms called trypanosomes and that these are  
486 transmitted by tsetse flies from infected animals to human beings. While community members were aware  
487 that human beings contract sleeping sickness after being bitten by tsetse flies, they did not talk about  
488 microorganisms.

489

## 490 **Beliefs about witchcraft and others**

491 Community members reported that beliefs about witchcraft causing this disease prevail in communities  
492 around the VMWR and that rHAT patients may spend long periods seeking traditional medicines. However,  
493 over the years the number of people with such beliefs has declined as they have seen that traditional healers  
494 cannot heal people with this disease while health facilities can. Studies in other countries also found that  
495 people believed they were bewitched, especially in the early days of the disease [10–13].

496  
497 Diseases are perceived to be caused by witchcraft when they do not respond to treatment from health  
498 facilities: in the initial stages of sleeping sickness, especially when the disease does not respond to anti-  
499 malarial treatment, a determination is made that the disease has been caused by witchcraft or other  
500 supernatural powers. This study also found that some respondents believed that r-HAT could be transmitted  
501 from mother to child or by eating bush meat contaminated by microorganisms. WHO mentions that the  
502 disease can be transmitted from mother to child and by sexual contact, but not by eating contaminated bush  
503 meat [14].

504

## 505 **Misdiagnosis of r-HAT**

506 The major challenge experienced in the management of sleeping sickness is diagnosis of the disease. This  
507 disease has similar signs and symptoms to malaria and we found that community members assume it is  
508 indeed malaria and are either prescribed antimalarials or self-medicate with painkillers, antimalarials or  
509 antibiotics. In most cases, r-HAT is diagnosed very late; Madanitsa et al. [15] argues that this is due to the  
510 weak surveillance system in Malawi. The elimination of sleeping sickness may not be achieved without  
511 improved case detection and management [16].

512  
513 If a disease does not respond to treatment, other causes will be suspected and this is the point at which  
514 people with sleeping sickness will resort to consulting traditional healers, believing that the disease has

515 been caused by witchcraft. Mulenga et. al. [10] have also argued that seeking treatment from traditional  
516 practitioners demonstrates that r-HAT is a pathology interpreted as having a supernatural origin.

517  
518 In terms of treating sleeping sickness, health workers, staff from the game reserve and community members  
519 reported that all cases are currently being treated at Rumphi District Hospital. While initially even diagnosis  
520 was performed at the district hospital, since 2013 health facilities around the VMWR have been equipped  
521 to provide diagnostic services for sleeping sickness. This is similar to the situation in South Sudan, where  
522 diagnosis and treatment of sleeping sickness is offered at designated places [12].

523  
524 Once diagnosed with sleeping sickness, a patient is supposed to travel to Rumphi District Hospital to initiate  
525 treatment. Study participants mentioned the barriers they experience when seeking treatment for r-HAT,  
526 including lack of transport, late diagnosis of sleeping sickness, lack of food and other items during the  
527 hospitalization period and the poor attitude of health workers. Other studies have also found that patients  
528 with sleeping sickness experience challenges, such as long distances to designated facilities that offer  
529 treatment for this disease and negative attitudes of health workers [10–12]. While in South Sudan the cost  
530 of health services was cited as a major barrier to accessing sleeping sickness services [12], in Malawi these  
531 are offered free of charge.

532

### 533 **The fear of lumbar puncture**

534 Many informants reported that they feared undergoing lumbar puncture and would, therefore, not go for  
535 timely treatment. Other studies have alluded to the fact that some patients might not return for follow up  
536 visits because of fear of lumbar puncture [10,11,13,17]. In a study in Kenya, just over a third of respondents  
537 reported that lumbar puncture would prevent them from going to hospital for diagnosis [18].

538

### 539 **Poor attitudes and practices of health workers**

540 Some study participants reported negative attitudes of health workers as a factor that influences informants  
541 to not seek treatment for r-HAT. Developing the target population's trust in health workers is important to  
542 increasing uptake of screening services for r-HAT; in this study, participants said that there are others who  
543 shun screening services for r-HAT because they think that during the process they could be tested for HIV,  
544 and most of them do not want to know their HIV status. Such beliefs were also reported in Kenya [18] and  
545 in the Democratic Republic of the Congo [11], where study participants believed that an HIV test was part  
546 of the r-HAT screening procedure. As argued by the WHO [19], these negative attitudes towards hospital  
547 treatment have often led to patients absconding and not completing treatment.

548

## 549 **Shortage of health workers**

550 One of the challenges reported by informants and health workers was the shortage of health workers who  
551 can manage r-HAT. The Malawi Ministry of Health acknowledges that it has a serious shortage of staff  
552 [20]. Mulenga et. al. [10] have also reported that such programmes experience high staff turnover, as  
553 reported in the current study, which affects the delivery of quality HAT services.

554

## 555 **Conclusion**

556 This study has shown that r-HAT is well known in the communities around the VMWR and that most  
557 community members are aware of the way r-HAT is transmitted, namely through tsetse flies. Although  
558 traditional beliefs about witchcraft being a cause of the disease exist, they are declining. While health  
559 facilities around the VMWR can diagnose r-HAT, such facilities do not currently provide treatment: all  
560 diagnosed cases are referred to the district hospital for treatment. The major challenge to accessing  
561 treatment is the cost of travel to the district hospital and subsistence during long periods of hospitalization.  
562 Access to r-HAT services, including treatment, could be improved if community members were further  
563 sensitized about the causes of the disease, its signs and symptoms and the fact that the disease can  
564 effectively be treated at the hospital but not by traditional healers. It is also critical that health facilities



565 around the VMWR provide treatment for r-HAT, as this would eliminate transport costs for patients and  
566 their guardians.

567

## 568 **Acknowledgments**

569 We would like thank the health team at Rumphu District Hospital for their assistance during the collection  
570 of data for this study. We extend our thanks to the Ministry of Health for their support in the conduct of  
571 the study especially during the training of research assistants. Our special thanks go to the patients, their  
572 families and communities for their participation in this study. Thanks also to Louise Burrows of DNDi for  
573 carefully editing the manuscript.

## 574 **References**

- 575 1. World Health Organization. Sustaining the drive to overcome the global impact of neglected  
576 tropical diseases: second WHO report on neglected diseases. 2013. Available:  
577 <https://apps.who.int/iris/handle/10665/77950>
- 578 2. World Health Organization, WHO Expert Committee on the Control and Surveillance of Human  
579 African Trypanosomiasis. Control and surveillance of human African trypanosomiasis: report of a  
580 WHO expert committee. 2013. Available: <https://apps.who.int/iris/handle/10665/95732>
- 581 3. Franco JR, Cecchi G, Paone M, Diarra A, Grout L, Ebeja AK, et al. The elimination of human  
582 African trypanosomiasis: Achievements in relation to WHO road map targets for 2020. *PLoS Negl*  
583 *Trop Dis.* 2022;16: e0010047. doi:10.1371/JOURNAL.PNTD.0010047
- 584 4. Lemerani M, Jumah F, Bessell P, Biéler S, Ndung'u JM. Improved Access to Diagnostics for  
585 Rhodesian Sleeping Sickness around a Conservation Area in Malawi Results in Earlier Detection  
586 of Cases and Reduced Mortality. *J Epidemiol Glob Health.* 2020;10: 280–287.  
587 doi:10.2991/JEGH.K.200321.001
- 588 5. Chisi JE, Muula AS, Ngwira B, Kabuluzi S. A retrospective study of human African  
589 trypanosomiasis in three Malawian districts. *Tanzan J Health Res.* 2011;13: 62–68.  
590 doi:10.4314/thrb.v13i1.61014
- 591 6. Odiit M, Kansime F, Enyaru J. Duration of symptoms and case fatality of sleeping sickness  
592 caused by *Trypanosoma brucei rhodesiense* in Tororo, Uganda. *East Afr Med J.* 1997;74: 792–  
593 795.

- 594 7. NTD Diseases Programme Government of Malawi. Malawi NTD Master Plan 2015-2020.  
595 Lilongwe; 2014. Available:  
596 [https://espen.afro.who.int/system/files/content/resources/MALAWI\\_NTD\\_Master\\_Plan\\_2015\\_2020.pdf](https://espen.afro.who.int/system/files/content/resources/MALAWI_NTD_Master_Plan_2015_2020.pdf)  
597
- 598 8. Partnership for Increasing the Impact of Vector Control. The role of vector control in preventing  
599 and responding to Rhodesian human African trypanosomiasis (rHAT) in Malawi. 2020. Available:  
600 <https://www.afidep.org/publication/the-role-of-vector-control-in-preventing-and-responding-to-rhodesian-human-african-trypanosomiasis-rhat-in-malawi/#>  
601
- 602 9. Reid H, Kibona S, Rodney A, McPherson B, Sindato C, Malele I, et al. Assessment of the burden  
603 of human African trypanosomiasis by rapid participatory appraisal in three high-risk villages in  
604 Urambo District, Northwest Tanzania. *Afr Health Sci.* 2012;12: 104–113. doi:10.4314/ahs.v12i2.5
- 605 10. Mulenga P, Lutumba P, Coppieters Y, Mpanya A, Mwamba-Miaka E, Luboya O, et al. Passive  
606 Screening and Diagnosis of Sleeping Sickness with New Tools in Primary Health Services: An  
607 Operational Research. *Infect Dis Ther.* 2019;8: 353–367. doi:10.1007/S40121-019-0253-  
608 2/FIGURES/4
- 609 11. Mpanya A, Hendrickx D, Vuna M, Kanyinda A, Lumbala C, Tshilombo V, et al. Should I Get  
610 Screened for Sleeping Sickness? A Qualitative Study in Kasai Province, Democratic Republic of  
611 Congo. *PLoS Negl Trop Dis.* 2012;6: e1467. doi:10.1371/JOURNAL.PNTD.0001467
- 612 12. Bukachi SA, Mumbo AA, Alak ACD, Sebit W, Rumunu J, Biéler S, et al. Knowledge, attitudes  
613 and practices about human African trypanosomiasis and their implications in designing  
614 intervention strategies for Yei county, South Sudan. *PLoS Negl Trop Dis.* 2018;12: e0006826.  
615 doi:10.1371/JOURNAL.PNTD.0006826
- 616 13. Neema S, Matovu E, Valverde O. An ethnographic study of local community and peripheral health  
617 centre staff perceptions and practices regarding sleeping sickness (r-HAT) to improve treatment  
618 access and extend case detection in Uganda. Geneva; 2020 [cited 14 Dec 2022]. Available:  
619 <https://dndi.org/wp-content/uploads/2021/10/HATrACC-DNDi-Uganda-rHAT-Ethnographic-Study-Report-2021.pdf>  
620
- 621 14. World Health Organization. Human African trypanosomiasis (sleeping sickness). 2022 [cited 14  
622 Dec 2022]. Available: [https://www.who.int/health-topics/human-african-trypanosomiasis#tab=tab\\_1](https://www.who.int/health-topics/human-african-trypanosomiasis#tab=tab_1)  
623
- 624 15. Madanitsa M, Chisi J, Ngwira B. The epidemiology of trypanosomiasis in Rumphi district,  
625 Malawi: a ten year retrospective study. *Malawi Medical Journal.* 2009;21: 22–27.  
626 doi:10.4314/mmj.v21i1.10985
- 627 16. Nolna SK, Ntonè R, Mbarga NF, Mbainda S, Mutangala W, Boua B, et al. Integration of  
628 Traditional Healers in Human African Trypanosomiasis Case Finding in Central Africa: A Quasi-  
629 Experimental Study. *Tropical Medicine and Infectious Disease* 2020, Vol 5, Page 172. 2020;5:  
630 172. doi:10.3390/TROPICALMED5040172

- 631 17. Mpanya A, Hendrickx D, Baloji S, Lumbala C, da Luz RI, Boelaert M, et al. From Health Advice  
632 to Taboo: Community Perspectives on the Treatment of Sleeping Sickness in the Democratic  
633 Republic of Congo, a Qualitative Study. PLoS Negl Trop Dis. 2015;9: e0003686.  
634 doi:10.1371/JOURNAL.PNTD.0003686
- 635 18. Barasa KW. Access barriers to formal health services: focus on sleeping sickness in Teso District,  
636 Western Kenya. PhD Thesis, University of Nairobi. 2012.
- 637 19. TDR World Health Organization. Report on African trypanosomiasis (sleeping sickness) 2001.  
638 Geneva; 2003. Available: [www.who.int/tdr](http://www.who.int/tdr)
- 639 20. Ministry of Health of Malawi. Mid-term evaluation of the health sector strategic plan 2017-2022.  
640 Lilongwe; 2021.

641

642
